# Supplementary material for: ZEPPI: Proteome-scale sequence-based evaluation of protein–protein interaction models
Source: PubMed Central journal article supplement — Proc Natl Acad Sci U S A. 2024 May 14;121(21):e2400260121. doi: 10.1073/pnas.2400260121 (PMC11127014; doi:10.1073/pnas.2400260121), 2024-05-14
Supplement: pnas.2400260121.sapp.pdf [file pnas.2400260121.sapp.pdf]

## Supporting Information for ZEPPI: proteome-scale sequence-based evaluation of protein-protein interaction models

Haiqing Zhao<sup>1</sup>, Donald Petrey<sup>1</sup>, Diana Murray<sup>1,\*</sup>, and Barry Honig<sup>1,2,3,4,\*</sup>

1. Department of Systems Biology, Columbia University Irving Medical Center, New York, NY 10032, USA
2. Department of Biochemistry and Molecular Biophysics, Columbia University Irving Medical Center, New York, NY 10032, USA
3. Department of Medicine, Columbia University, New York, NY 10032, USA
4. Zuckerman Mind Brain and Behavior Institute, Columbia University, New York, NY 10027, USA

Paste corresponding author name here  
Email: dm527@columbia.edu; bh6@columbia.edu

### This PDF file includes:

Figures S1 to S7  
Legends for Figures S1 to S7  
Table S1  
Legend for Table S1

Other supporting datasets for this manuscript can be found on the online repository:  
<https://doi.org/10.6084/m9.figshare.c.6800502.v1>.

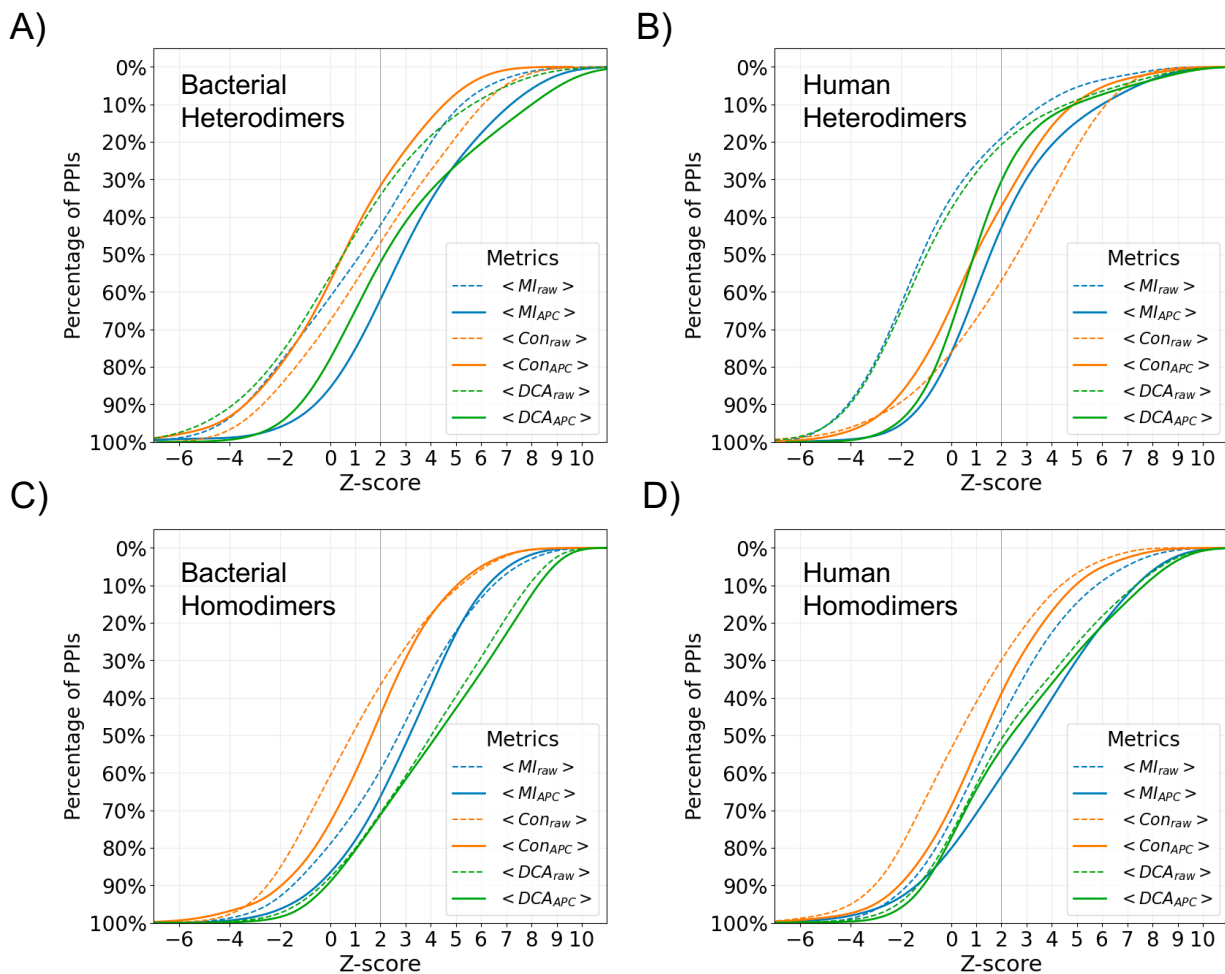

**SI Figure S1. Percentage of PDB PPIs as a function of Z-score for raw and APC-corrected metrics averaged over interface contacts.** Colors and line type defined in the legend indicate curves for different metrics (Supplementary File 1).

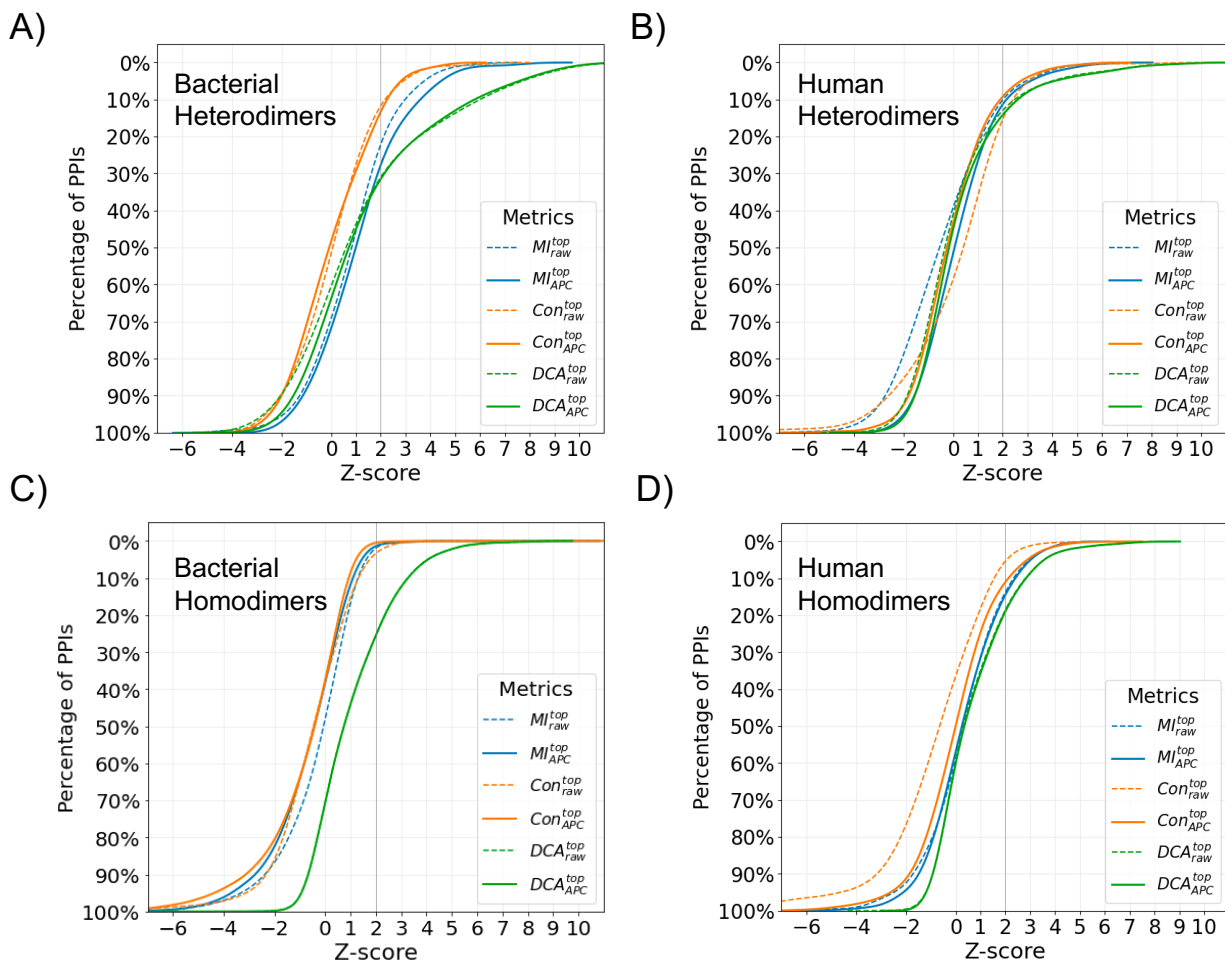

**SI Figure S2. Percentage of PDB PPIs as a function of Z-score for the interface contact with the top value for a given metric.** Colors and line type defined in the legend indicate curves for different metrics (Supplementary File 1).

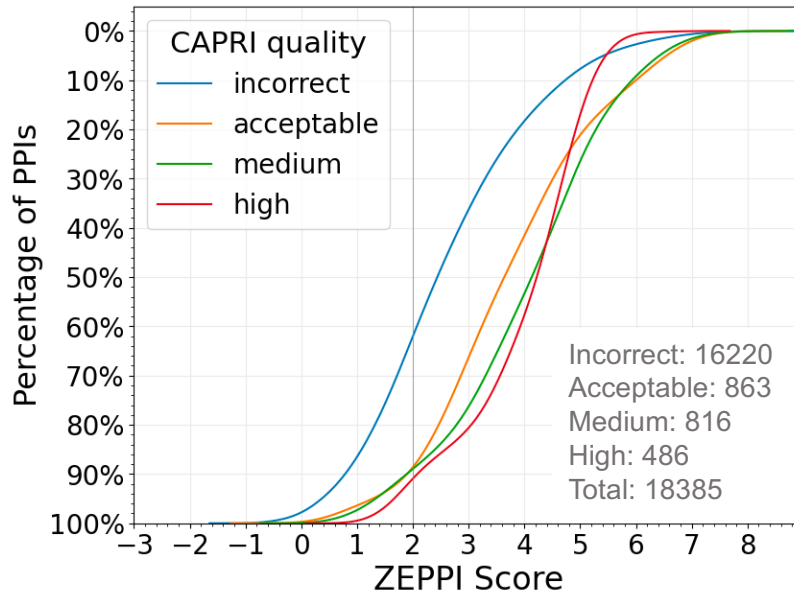

**SI Figure S3. Percentage of CAPRI structures and decoys having a given ZEPPI score.** Percentages are plotted along the y-axis for four classes of CAPRI models defined in the legend. The total number of models in each class is indicated in the text at the lower left. See Supplementary File 2 for details.

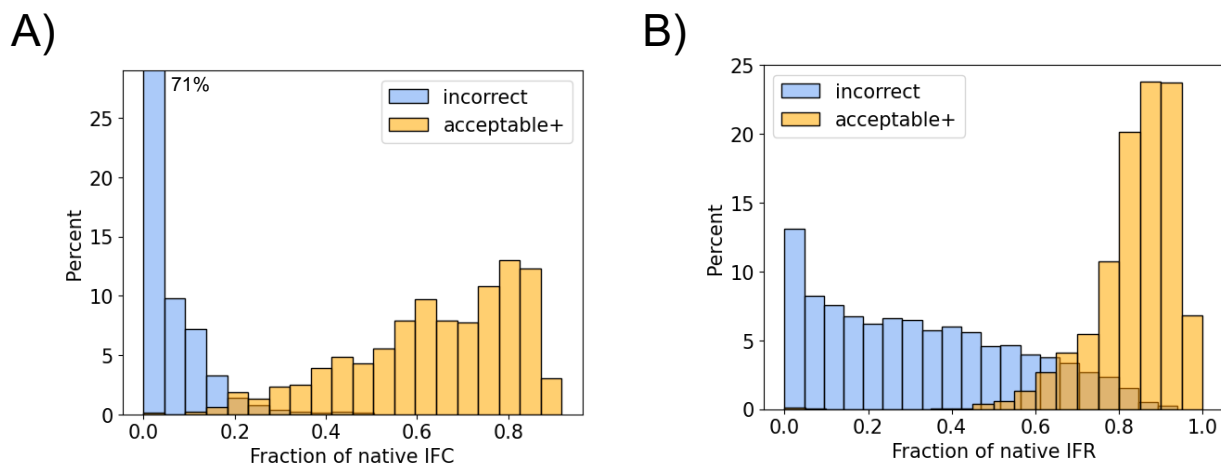

**SI Figure S4. Distribution of the fraction of native interface contacts and interface residues for CAPRI decoys from score\_set.** (A) The fraction of native interface contacts  $f_{IFC}$  well distinguishes the acceptable+ decoys (orange) from incorrect ones (blue). (B) Incorrect CAPRI decoys can have large fractions of native interface residues  $f_{IFR}$  (blue) and their distribution has a significant overlap with  $f_{IFR}$  of the acceptable+ decoys (orange).

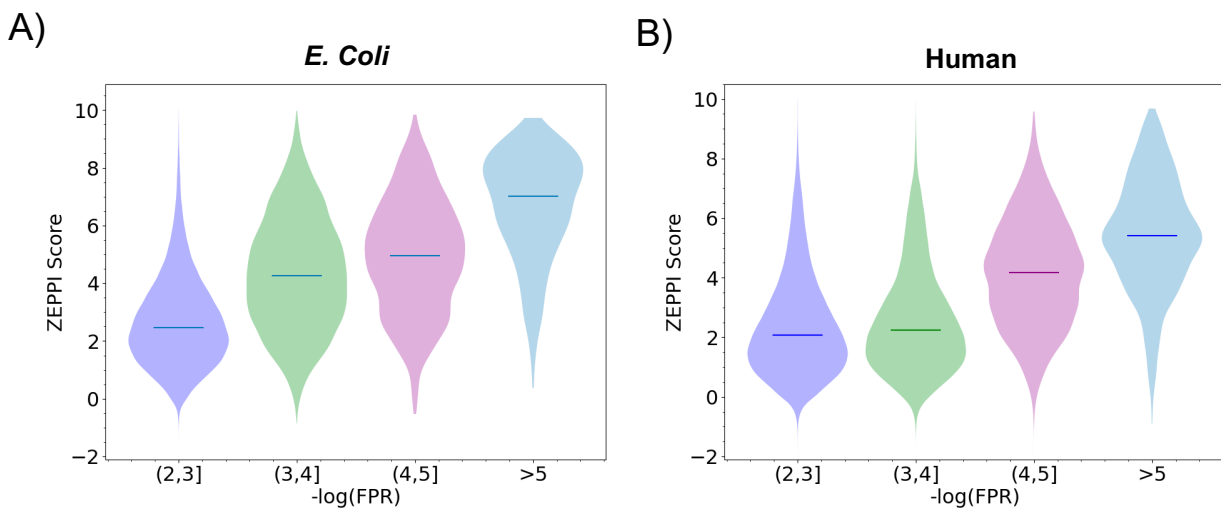

**SI Figure S5. Relationship between the ZEPPI score and FPR of PrePPI-predicted PPIs .** FPR ranges are indicated below each set of color-coded violin charts, where the median ZEPPI scores are shown as a bar. See Supplementary Files 3-5 for details.

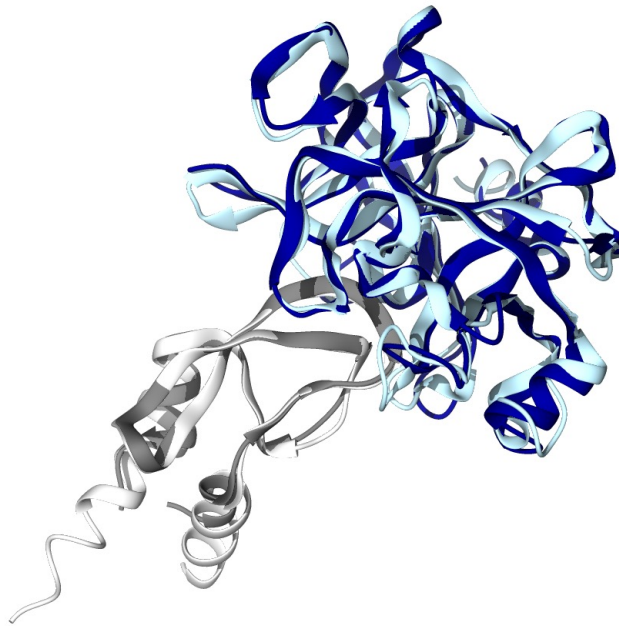

APP (Amyloid-beta precursor protein)

CELA1 (Chymotrypsin-like elastase family member 1)

4bnr: Trypsin inhibitor (*Bos Taurus*) / Trypsin (*Astacus leptodactylus*)

**SI Figure S6. Interaction model for Amyloid-beta precursor protein, APP(294-341) (light gray), and Chymotrypsin-like elastase family member 1, CELA1(19-258) (light blue).** The template for modeling (PDB ID: 4bnr) is a complex of Trypsin inhibitor from *Bos Taurus* (dark gray) and Trypsin from *Astacus leptodactylus* (dark blue). PrePPI FPR < 0.0001, and ZEPPI score = 5.1. The pairwise sequence identities between queries and template chains are 26% and 33%, respectively.

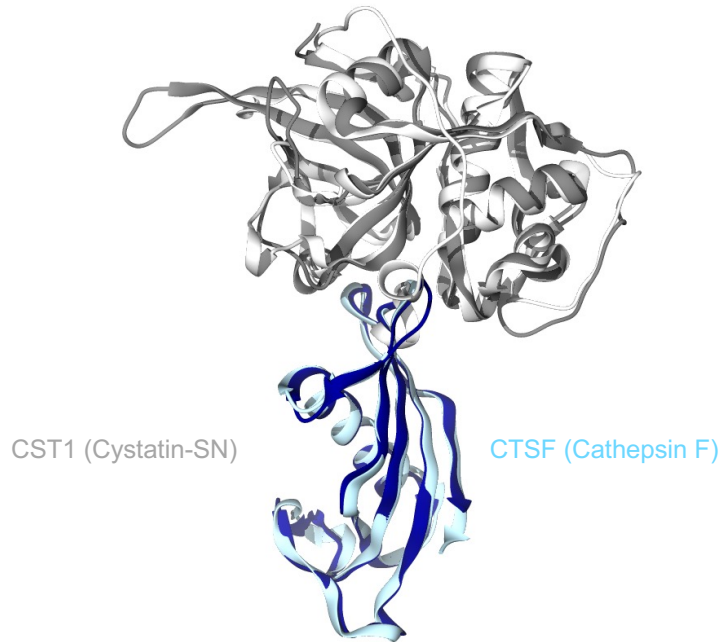

1yvb: Falcipain 2 from *Plasmodium falciparum* / Cystatin from *Gallus gallus*

**SI Figure S7. Interaction model for Cystatin-SN, CST1(35-141) (light gray), and Cathepsin F, CTSF(244-484) (light blue).** The template for modeling (PDB ID: 1yvb) is a complex of Falcipain 2 from *Plasmodium falciparum* (dark gray) and Cystatin from *Gallus gallus* (dark blue). PrePPI FPR < 0.005, and ZEPPI score = 5.9. The pairwise sequence identities between queries and template chains are 19% and 32%, respectively.

**SI Table S1. Properties and ZEPPI performance of each CAPRI target.**

| ID       | $N_{MSA}$ | $\langle N_{IFR} \rangle$ | $N_{\geq accpt.}$ | $N_{incorrect}$ | AUROC (ZEPPI) |
|----------|-----------|---------------------------|-------------------|-----------------|---------------|
| Target29 | 623       | 64                        | 167               | 1916            | 0.926         |
| Target30 | 155       | 42                        | 2                 | 1341            | 0.550         |
| Target32 | 62        | 70                        | 15                | 584             | 0.687         |
| Target35 | 161       | 65                        | 3                 | 496             | 0.528         |
| Target37 | 142       | 48                        | 99                | 1401            | 0.542         |
| Target39 | 267       | 58                        | 4                 | 1396            | 0.843         |
| Target40 | 55        | 61                        | 588               | 1592            | 0.664         |
| Target41 | 27        | 50                        | 371               | 829             | 0.755         |
| Target46 | 1396      | 56                        | 24                | 1675            | 0.651         |
| Target47 | 24        | 53                        | 611               | 440             | 0.930         |
| Target50 | 88        | 3                         | 133               | 1318            | 0.734         |
| Target53 | 2112      | 55                        | 130               | 1270            | 0.742         |
| Target54 | 198       | 49                        | 19                | 1381            | 0.763         |
